# Supplementary material for: When Mayo falls short ( C tr ≫ 1): the use of cumulative chain length distribution data in the determination of chain transfer constants ( C tr ) for radical polymerizations
Source: Royal Society of Chemistry journal article supplement (doi:10.1039/d0py00348d), 2020-01-01
Supplement: d0py00348d1.pdf [file d0py00348d1.pdf]

ELECTRONIC SUPPLEMENTARY INFORMATION (ESI) FOR:

## **When Mayo falls Short ( $C_{tr} \gg 1$ ): The use of Cumulative Chain Length Distribution Data in the Determination of Chain Transfer Constants ( $C_{tr}$ ) for Radical Polymerizations.**

Matt K. Donald,<sup>a</sup> and Stefan A. F. Bon.\*<sup>a</sup>

---

<sup>a</sup> Department of Chemistry, The University of Warwick, CV4 7AL, United Kingdom. E-mail: S.Bon@warwick.ac.uk Web: www.bonlab.info

### CONTENT OF ESI:

- S1. Molecular weight distributions as obtained from SEC analysis,  $dw(\log M)$ , obtained for the free radical polymerization of vinyl acetate at 333.15 K in presence of various amounts of *n*-dodecanethiol as chain transfer agent.
- S2. Natural logarithmic versions of the chain length distributions,  $P(i)$  at various stages of monomer conversion, obtained for the free radical polymerization of vinyl acetate at 333.15 K in presence of various amounts of *n*-dodecanethiol as chain transfer agent.
- S3. Example GC chromatogram showing the elution behaviour of the reactants.
- S4. GC calibration Equation, data and fit.
- S5.  $dw/d \log M$  distribution of the poly(vinyl acetate) sample used for triple detection analysis and the determined intrinsic viscosity  $[\eta]$  as a function of MW with the fitted  $K$  and  $\alpha$  values.

## S1. Molecular weight distributions

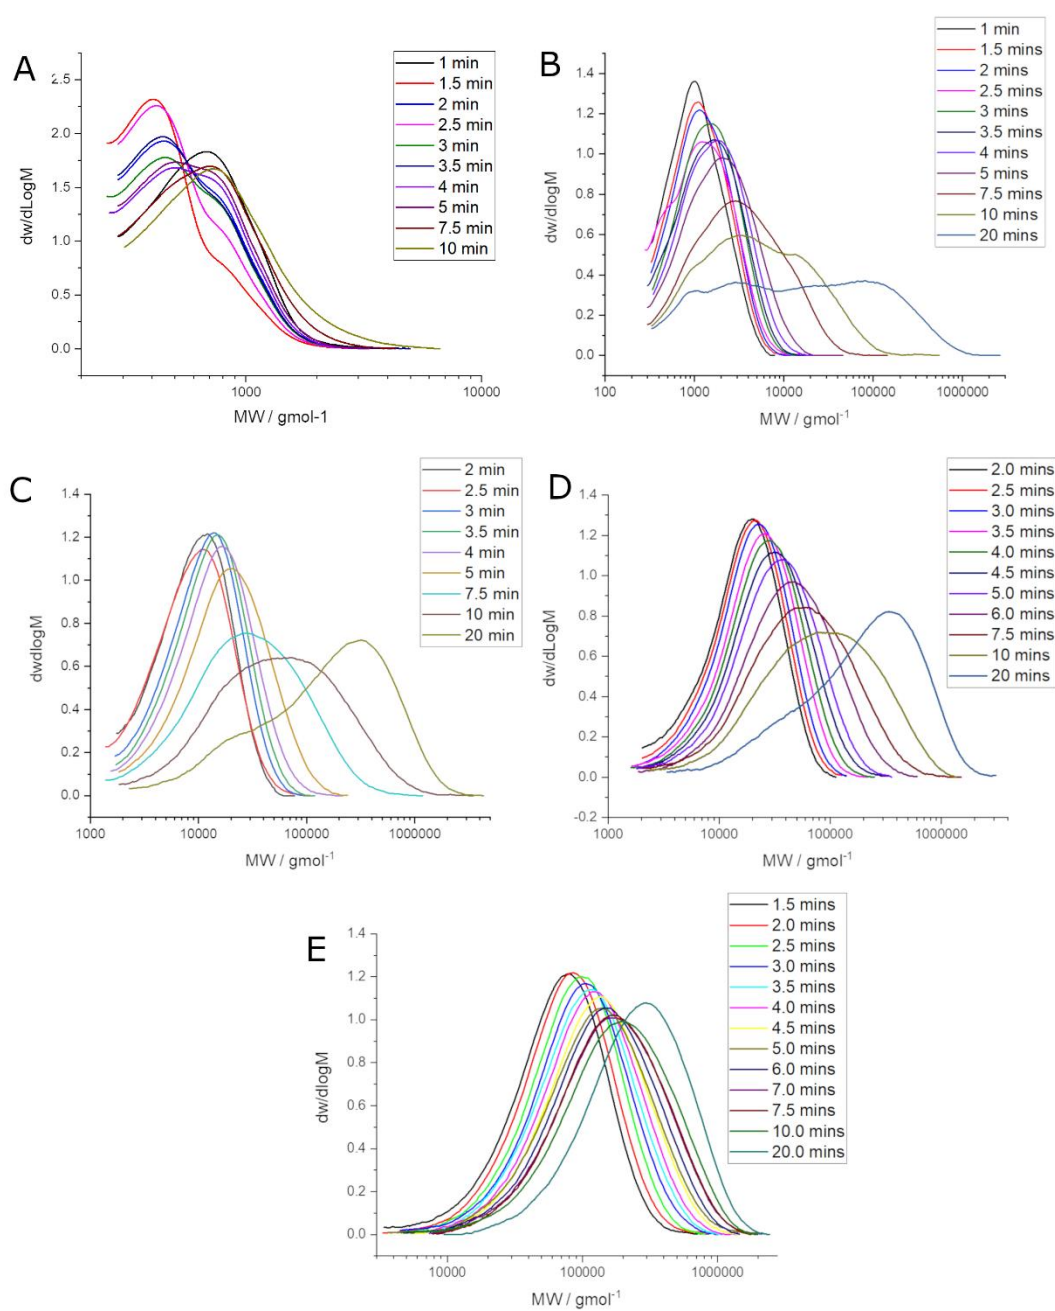

**Figure S1:** Molecular weight distributions,  $dw/d\log M$  as a function of molecular weight ( $\text{gmol}^{-1}$ ), were A, B, C, D and E correspond to  $[\text{DDT}]_{p=0}/[\text{VA}]_{p=0} = 1 \times 10^{-2}$ ,  $1 \times 10^{-3}$ ,  $1 \times 10^{-4}$ ,  $5 \times 10^{-5}$  and  $1 \times 10^{-5}$  respectively.

## S2. $\ln P(i)$ plots as a function of time

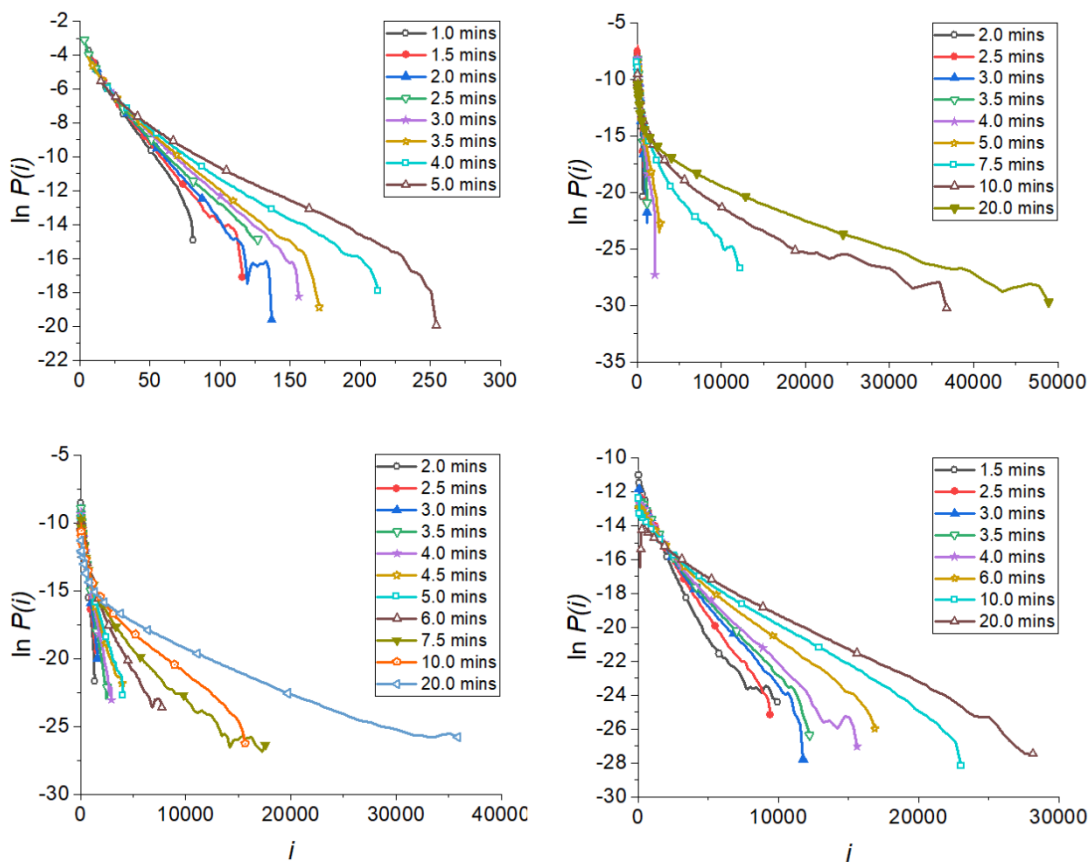

**Figure S2:**  $\ln P(i)$  distributions at increasing polymerisation times where  $[DDT]_{p=0}/[VA]_{p=0} = 1 \times 10^{-3}$  (top left),  $1 \times 10^{-4}$  (top right),  $5 \times 10^{-5}$  (bottom left) and  $1 \times 10^{-5}$  (bottom right) respectively.

## S3. Example GC chromatogram

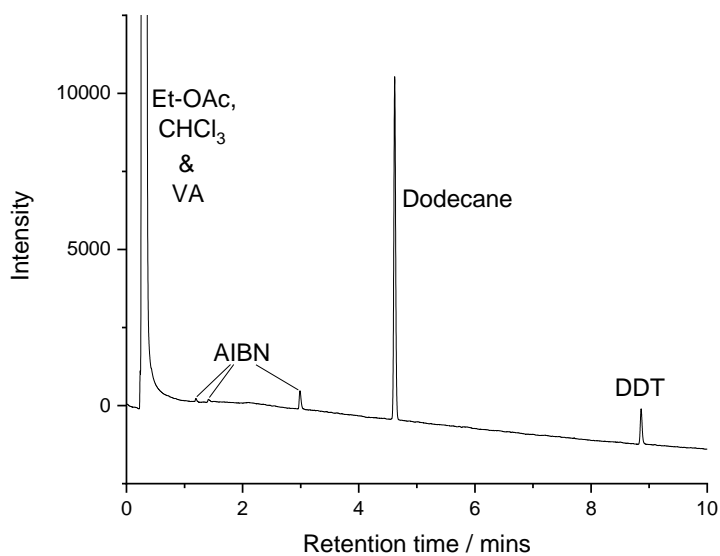

**Figure S3:** Example GC chromatogram showing the elution behaviour of the reactants.

**S4. GC calibration Equation, data and fit**

$$y = bx + c$$

Where  $b = 1.0032$  and  $c = 2.066 \times 10^{-3}$

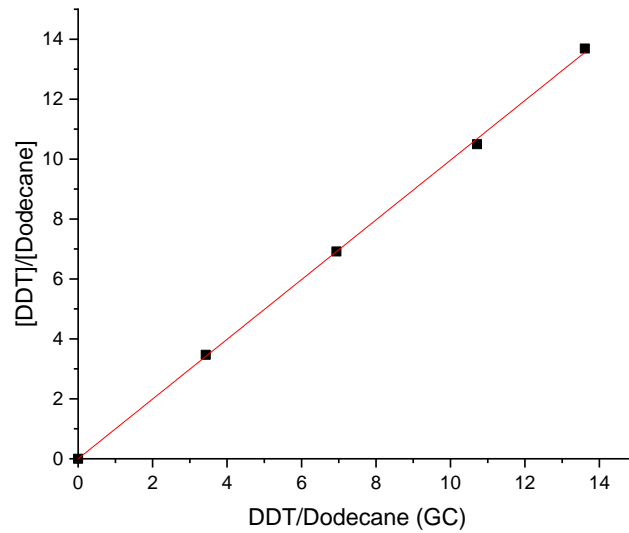

**Figure S4:** Calibration plot showing the relationship between the [DDT]/[Dodecane] ratio and the ratio of the signals recorded in the GC chromatogram.

## S5. Determination of Mark-Houwink-Sakurada parameters

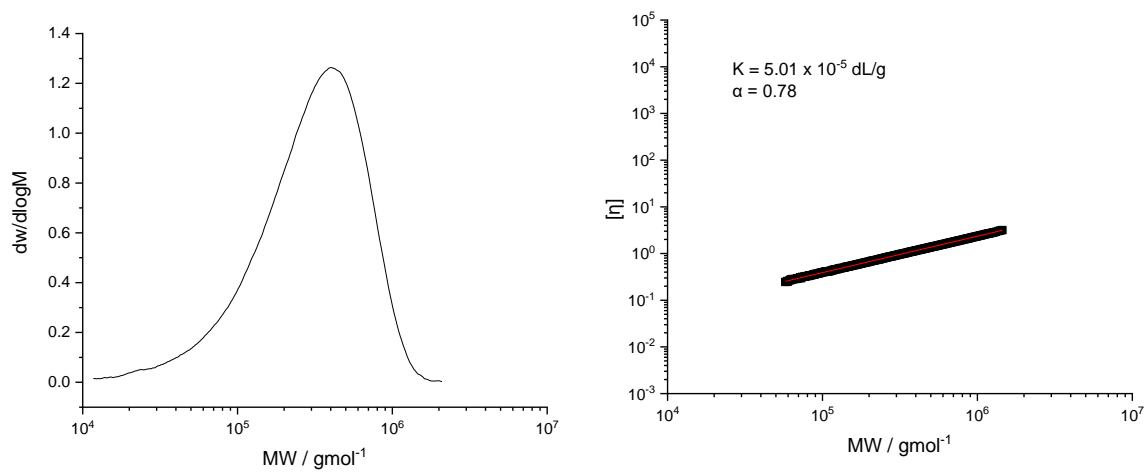

**Figure S5:**  $dw/d \log M$  distribution of the poly(vinyl acetate) sample used for triple detection analysis (left) and the determined intrinsic viscosity  $[\eta]$  as a function of MW with the fitted  $K$  and  $\alpha$  values.
